# Supplementary material
Source: publisher figshare collection journal article supplement (https://frontiersin.figshare.com/ndownloader/files/12738542)
Supplement: Supplementary file 1 [file 12738542]

## Supplementary Material

# Acoustic Ecology Metrics in an Alaska Marine Protected Area Reveal Underwater Marine Mammal Communication Masking and Management Alternatives

### Supplementary Tables

#### Supplementary Table 1. Specifications for vessels used in modeling communication space and masking.

Categories refer to Park administrative categories (see Table 2). Source levels are given in dB re 1  $\mu$ Pa at 1m within the 40-780 Hz frequency band of interest for humpback whale and harbor seal communication sounds (Table 2). Vessel source levels marked with an asterisk (\*) are derived from calibrated measurements of that specific vessel. All others are estimated based on sound levels from comparable vessels.

| Model Day | Category           | Type                        | Description                                                  | Length (m) | Engine Type                | Engine Specifications                                                                                                                                       | Median Speed (kts) | Source Level* |
|-----------|--------------------|-----------------------------|--------------------------------------------------------------|------------|----------------------------|-------------------------------------------------------------------------------------------------------------------------------------------------------------|--------------------|---------------|
| 1         | charter            | overnight passenger vessel  | wooden hull, former minesweeper, now 12-passenger vessel     | 30.0       | single diesel              | 400 hp diesel                                                                                                                                               | 3                  | 132.7*        |
| 1         | charter            | day excursion vessel        | fiberglass hull runabout                                     | 11.6       | twin gas inboard-outboards | 185 hp Volvo 41 P diesels                                                                                                                                   | 9                  | 173.6         |
| 1         | charter            | overnight passenger vessel  | steel hull passenger vessel                                  | 19.1       | twin diesels               | 251 hp John Deere 6068 4-stroke dry exhaust diesels                                                                                                         | 12                 | 174.5         |
| 1         | charter            | overnight passenger vessel  | steel hull passenger vessel                                  | 13.7       | single diesel              | 225 diesel                                                                                                                                                  | 8                  | 174.6         |
| 1         | charter            | day excursion vessel        | Munson Pack-Cat                                              | 11.6       | twin diesels               | 350 hp Navistar Power-stroke diesels                                                                                                                        | 20                 | 177.2         |
| 1         | commercial fishing | fishing vessel              | USGS research vessel, converted F/V, Ledford fiberglass hull | 15.2       | single diesel              | 480 hp diesel                                                                                                                                               | 6                  | 172.8         |
| 1         | cruise ship        | 1,432 passenger cruise ship | direct drive cruise ship                                     | 238.0      | diesel electric            | diesel-electric with five 514-rpm, 4-cycle, diesel generators, and two main propulsion electric motors. Two propulsion shafts and two 4-bladed controllable | 17                 | 180.4*        |

| Model Day | Category | Type           | Description                                         | Length (m) | Engine Type     | Engine Specifications                | Median Speed (kts) | Source Level* |
|-----------|----------|----------------|-----------------------------------------------------|------------|-----------------|--------------------------------------|--------------------|---------------|
|           |          |                |                                                     |            |                 | pitch propellers.                    |                    |               |
| 1         | NPS      | pilot boat     | Kvichak Marine aluminum cabin cruiser, planing hull | 10.4       | twin diesels    | 310 hp Cummins 5.9 liter I-6 diesels | 7                  | 153.2*        |
| 1         | NPS      | pilot boat     | Kvichak Marine aluminum cabin cruiser, planing hull | 10.4       | twin diesels    | 310 hp Cummins 5.9 liter I-6 diesels | 8                  | 153.2*        |
| 1         | NPS      | patrol vessel  | aluminum hull workboat                              | 8.5        | twin outboards  | 225 hp outbds                        | 20                 | 156.5*        |
| 1         | NPS      | research skiff | Lund aluminum skiff                                 | 5.5        | single outboard | 40 hp Mercury hp 4-stroke outbd      | 7                  | 165.5*        |
| 1         | private  | powerboat      | Grady White Seafarer powerboat                      | 8.5        | twin outboards  | 225 hp 4-stroke outbds               | 15                 | 155.3         |
| 1         | private  | sailboat       | wooden sailing sloop                                | 12.6       | single diesel   | 25-40 hp diesel inbd                 | 7                  | 155.5         |
| 1         | private  | sailboat       | Beneteau sailing vessel                             | 12.9       | single diesel   | 50 hp Yanmar diesel engine           | 7                  | 155.5         |
| 1         | private  | powerboat      | aluminum hull landing craft                         | 8.5        | twin outboards  | 225 hp Honda outbds                  | 18                 | 157           |
| 1         | private  | powerboat      | Nordic Tug                                          | 9.8        | single diesel   | 305 Cummins diesel Single            | 0                  | 168.4         |
| 1         | private  | powerboat      | Nordic Tug                                          | 13.2       | single diesel   | 220 Cummins diesel                   | 3                  | 168.6         |
| 1         | private  | powerboat      | fiberglass hull power boat                          | 11.5       | single diesel   | diesel engine                        | 0                  | 170           |
| 1         | private  | sailboat       | sailing sloop                                       | 14.7       | single diesel   | 125 hp Yanmar diesel                 | 5                  | 172.6         |
| 1         | private  | powerboat      | fiberglass powerboat                                | 9.1        | unknown         | 225 hp Yamaha outbds                 | 9                  | 176.7         |
| 1         | private  | sailboat       | McGregor sailing vessel                             | 7.9        | single outboard | 8 hp Nissan 2-stroke outbd           | 0                  | 176.8         |
| 1         | private  | sailboat       | Waterline 50 sailing vessel                         | 15.4       | single diesel   | 160 hp Yanmar 4LHA-HTP diesel        | 6                  | 176.8         |
| 1         | private  | powerboat      | Armstrong aluminum catamaran powerboat              | 9.4        | twin outboards  | 250 hp Yamaha outbds                 | 11                 | 182.8         |

| Model Day | Category       | Type                        | Description                                              | Length (m) | Engine Type                | Engine Specifications                                                                             | Median Speed (kts) | Source Level* |
|-----------|----------------|-----------------------------|----------------------------------------------------------|------------|----------------------------|---------------------------------------------------------------------------------------------------|--------------------|---------------|
| 1         | private        | powerboat                   | aluminum hull landing craft                              | 8.5        | twin outboards             | 225 hp Honda outbds                                                                               | 25                 | 198.2         |
| 1         | research       | research skiff              | rubber inflatable                                        | 4.8        | single outboard            | 50 hp Honda 4-stroke                                                                              | 15                 | 180.5         |
| 1         | tour           | day tour vessel             | aluminum hull catamaran passenger vessel                 | 21.8       | twin diesels               | 873 hp Caterpillar C-18 diesels                                                                   | 25                 | 144.5*        |
| 1         | tour           | day tour vessel             | aluminum hull catamaran passenger vessel                 | 23.9       | twin diesels               | 600 hp diesels for jet drives                                                                     | 9                  | 166.7*        |
| 1         | US Coast Guard | patrol vessel               | Juniper-Class Buoy Tender                                | 63.7       | twin diesels               | 3100 hp Caterpillar 3608 diesel engines, single shaft, 450 hp bow thruster, 550 hp stern thruster | 10                 | 179.4         |
| 2         | charter        | overnight passenger vessel  | wooden hull, former minesweeper, now 12-passenger vessel | 30.0       | single diesel              | 400 hp diesel                                                                                     | 8                  | 132.7*        |
| 2         | charter        | overnight passenger vessel  | steel hull passenger vessel                              | 19.8       | twin diesels               | 300 hp John Deere diesels                                                                         | 10                 | 169.4         |
| 2         | charter        | overnight passenger vessel  | steel hull passenger vessel                              | 13.7       | single diesel              | 225 diesel                                                                                        | 8                  | 169.9         |
| 2         | charter        | day excursion vessel        | fiberglass hull runabout                                 | 11.6       | twin gas inboard-outboards | 185 hp Volvo 41 P diesels                                                                         | 9                  | 169.9         |
| 2         | cruise ship    | 2,670 passenger cruise ship | azipod cruise ship                                       | 289.9      | diesel electric            | gas turbine 25 MW /2 azipods 21,000 KW each                                                       | 13                 | 174.9*        |
| 2         | cruise ship    | 1,970 passenger cruise ship | direct drive cruise ship                                 | 293.8      | diesel electric            | combined diesel and gas-turbine configuration with two diesel generator-sets                      | 13                 | 175.7*        |
| 2         | NPS            | pilot boat                  | Kvichak Marine aluminum cabin cruiser, planing hull      | 10.4       | twin diesels               | 310 hp Cummins 5.9 liter I-6 diesels                                                              | 7                  | 147.2*        |
| 2         | NPS            | pilot boat                  | Kvichak Marine aluminum cabin cruiser, planing hull      | 10.4       | twin diesels               | 310 hp Cummins 5.9 liter I-6 diesels                                                              | 6                  | 147.2*        |
| 2         | NPS            | research skiff              | Safeboat skiff with pilothouse, planing hull             | 5.8        | single outboard            | 150 hp 2-stroke E-Tec Evinrude outbd                                                              | 5                  | 147.8*        |
| 2         | NPS            | patrol vessel               | Metalcraft aluminum cabin cruiser with planing hull      | 7.9        | twin gas inboard-outboards | 210 hp V6 Mercruiser gasoline inbd-outbd engines                                                  | 16                 | 149.2*        |

| Model Day | Category | Type            | Description                             | Length (m) | Engine Type     | Engine Specifications                                    | Median Speed (kts) | Source Level* |
|-----------|----------|-----------------|-----------------------------------------|------------|-----------------|----------------------------------------------------------|--------------------|---------------|
| 2         | NPS      | research vessel | Stanley Bullnose aluminum landing craft | 7.9        | single diesel   | 350 hp Mercruiser 350 Magnum I/O w/ Bravo 3 outdrive     | 10                 | 155.3*        |
| 2         | NPS      | research skiff  | Lund aluminum skiff                     | 5.5        | single outboard | 40 hp Mercury hp 4-stroke outbd                          | 19                 | 155.3*        |
| 2         | NPS      | research skiff  | Lund aluminum skiff                     | 5.5        | single outboard | 40 hp 2-stroke outbd                                     | 8                  | 155.8*        |
| 2         | NPS      | research skiff  | Lund aluminum skiff                     | 5.5        | single outboard | 40 hp Mercury hp 4-stroke outbd                          | 23                 | 188.2*        |
| 2         | private  | sailboat        | Hunter sailing vessel                   | 11.3       | single diesel   | 40 hp Yanmar diesel                                      | 7                  | 147.2         |
| 2         | private  | powerboat       | Hewscraft Sportsman aluminum powerboat  | 4.9        | single outboard | 70-90 hp Yamaha outbd                                    | 6                  | 149.2         |
| 2         | private  | powerboat       | Armstrong aluminum catamaran powerboat  | 9.4        | twin outboards  | 250 hp Yamaha outbds                                     | 1                  | 150           |
| 2         | private  | sailboat        | staysail sailing ketch                  | 23.8       | single diesel   | 170 hp Rolls-Royce CN34                                  | 5                  | 151.3         |
| 2         | private  | powerboat       | Hewscraft cabin cruiser                 | 7.9        | twin outboards  | 115 hp Yamaha outbds                                     | 7                  | 151.9         |
| 2         | private  | sailboat        | Sailing vessel                          | 10.5       | single diesel   | 335-370 hp diesel. estimated QSB 380 diesel              | 5                  | 154           |
| 2         | private  | powerboat       | Bayliner powerboat                      | 17.7       | single diesel   | 150 hp, 4 cylinder, 4-stroke in line water cooled diesel | 0                  | 157.3         |
| 2         | private  | sailboat        | Caliber 40 LRC sailing vessel           | 11.9       | single diesel   | 50 hp Yanmar diesel                                      | 5                  | 158.3         |
| 2         | private  | motor yacht     | Selene motor yacht                      | 18.3       | twin diesels    | 330 hp Cummins diesels                                   | 6                  | 158.3         |
| 2         | private  | powerboat       | North River aluminum powerboat          | 6.1        | single outboard | 150 hp outbd                                             | 1                  | 159.4         |
| 2         | private  | motor yacht     | North Pacific motor yacht               | 16.0       | single diesel   | 490 hp Cummins QSB diesel                                | 6                  | 163.5         |
| 2         | private  | motor yacht     | motor yacht                             | 17.8       | single diesel   | 330 hp actual                                            | 6                  | 166.6         |

| Model Day | Category           | Type                       | Description                                           | Length (m) | Engine Type     | Engine Specifications                | Median Speed (kts) | Source Level* |
|-----------|--------------------|----------------------------|-------------------------------------------------------|------------|-----------------|--------------------------------------|--------------------|---------------|
| 2         | private            | powerboat                  | Nordic Tug                                            | 9.8        | single diesel   | 305 Cummins diesel Single            | 0                  | 167.3         |
| 2         | private            | motor yacht                | motor yacht                                           | 13.4       | single diesel   | 450 hp Cummins diesel engine         | 10                 | 168.4         |
| 2         | private            | motor yacht                | Ta Shing Yacht Ltd. Fiberglass motor yacht            | 20.7       | single diesel   | 425 hp @ 1900 rpm, 6135AFM75         | 7                  | 169.3         |
| 2         | private            | motor yacht                | Selene 60 motor yacht                                 | 19.8       | twin diesels    | 330 hp Cummins diesels               | 9                  | 169.9         |
| 2         | private            | motor yacht                | motor yacht                                           | 12.0       | single diesel   | diesel engine                        | 0                  | 170.1         |
| 2         | research           | research skiff             | Kellahan Marine aluminum powerboat, displacement hull | 6.1        | single outboard | 115 hp Yamaha outbd                  | 11                 | 169.7         |
| 2         | tour               | day tour vessel            | aluminum hull catamaran passenger vessel              | 21.8       | twin diesels    | 873 hp Caterpillar C-18 diesels      | 23                 | 144.5*        |
| 2         | tour               | overnight passenger vessel | steel hull passenger vessel                           | 37.2       | twin diesels    | 680 hp diesels                       | 7                  | 161.3*        |
| 3         | charter            | overnight passenger vessel | steel hull passenger vessel                           | 13.7       | single diesel   | 225 diesel                           | 8                  | 173.5         |
| 3         | commercial fishing | fishing vessel             | steel hull commercial trolling vessel                 | 14.6       | single diesel   | 300 hp diesel                        | 8                  | 180.4         |
| 3         | commercial fishing | fishing vessel             | commercial fishing vessel                             | 11.6       | single diesel   | 210 hp diesel                        | 7                  | 182.6         |
| 3         | NPS                | pilot boat                 | Kvichak Marine aluminum cabin cruiser, planing hull   | 10.4       | twin diesels    | 310 hp Cummins 5.9 liter I-6 diesels | 4                  | 153.2*        |
| 3         | private            | motor yacht                | Bayliner fiberglass motor yacht                       | 14.3       | single diesel   | 310 hp Hino W06DTII diesel           | 7                  | 155.5         |
| 3         | private            | motor yacht                | CHB Sedan motor yacht                                 | 13.6       | twin diesels    | 350 hp Caterpillar 3208 diesels      | 6                  | 170.8         |
| 3         | private            | powerboat                  | Radier 8422 powerboat                                 | 6.7        | single outboard | 200 hp outbd                         | 0                  | 172.5         |
| 3         | private            | skiff                      | Hewscraft 160 Sportsman aluminum skiff                | 4.9        | single outboard | 70-90 hp Yamaha outbd                | 3                  | 175.6         |
| 3         | private            | motor yacht                | Hakvoort steel and aluminum hull motor yacht          | 50.0       | twin diesels    | 1290 hp Caterpillar diesels          | 11                 | 175.6         |
| 3         | private            | skiff                      | Cobra aluminum skiff                                  | 6.7        | single outboard | 140 hp Suzuki 4-stroke outbd         | 0                  | 176.8         |

| Model Day | Category        | Type                       | Description                              | Length (m) | Engine Type  | Engine Specifications                                                                | Median Speed (kts) | Source Level* |
|-----------|-----------------|----------------------------|------------------------------------------|------------|--------------|--------------------------------------------------------------------------------------|--------------------|---------------|
| 3         | private         | motor yacht                | Bayliner 4788 motor yacht                | 14.4       | twin diesels | 330 hp Cummins diesels                                                               | 0                  | 183.5         |
| 3         | private         | powerboat                  | fiberglass Seasport                      | 9.1        | twin diesels | 300 hp Volvo Penta KAD diesels                                                       | 8                  | 183.7         |
| 3         | State of Alaska | research ship              | steel hull research vessel               | 33.5       | twin diesels | 600 hp Cummins V1692 diesels                                                         | 7                  | 171.9         |
| 3         | tour            | day tour vessel            | aluminum hull catamaran passenger vessel | 21.8       | twin diesels | 873 hp Caterpillar C-18 diesels                                                      | 23                 | 144.5*        |
| 3         | tour            | overnight passenger vessel | steel hull passenger vessel              | 38.6       | twin diesels | 1400 hp 6140 Lugger diesels                                                          | 7                  | 166.4         |
| 3         | US Coast Guard  | patrol vessel              | Kvichak Marine aluminum hull vessel      | 13.7       | twin diesels | 825 hp Detroit Series 60 turbocharged diesels with Rolls Royce water jet propulsion  | 12                 | 180.2*        |
| 3         | US Coast Guard  | patrol vessel              | Kvichak Marine aluminum hull vessel      | 13.7       | twin diesels | 825 hp Detroit Series 60 turbocharged diesels with Rolls Royce water jet propulsion. | 13                 | 180.4*        |
